# Supplementary material for: IFN-γ and donor leukocyte infusions for relapsed myeloblastic malignancies after allogeneic hematopoietic stem cell transplantation
Source: JCI journal article supplement (doi:10.1172/jci.insight.190655), 2025-03-25

## Supplemental material

**Supplemental Table 1. Grades and frequencies of all adverse events.**

| IFN-gamma monotherapy (Stage 1)                |                  |      |                     |      |                                             |
|------------------------------------------------|------------------|------|---------------------|------|---------------------------------------------|
| Adverse event term                             | Any grade<br>(n) | %    | Grade 3 or 4<br>(n) | %    | Comment                                     |
| Hematologic                                    |                  |      |                     |      |                                             |
| Anemia                                         | 4                | 57%  | 3                   | 43%  |                                             |
| Decreased ALC                                  | 4                | 57%  | 4                   | 57%  |                                             |
| Decreased ANC                                  | 3                | 43%  | 2                   | 29%  |                                             |
| Decreased platelets                            | 2                | 29%  | 2                   | 29%  |                                             |
| Decreased WBC                                  | 1                | 14%  | 1                   | 14%  |                                             |
| Non-hematologic                                |                  |      |                     |      |                                             |
| Bone Pain                                      | 1                | 14%  | 0                   | 0%   |                                             |
| Fatigue                                        | 1                | 14%  | 0                   | 0%   |                                             |
| Flu like symptoms                              | 3                | 43%  | 0                   | 0%   |                                             |
| Foot pain                                      | 1                | 14%  | 0                   | 0%   |                                             |
| Headache                                       | 1                | 14%  | 0                   | 0%   |                                             |
| Hypotension- intermittent                      | 1                | 14%  | 0                   | 0%   |                                             |
| Insomnia                                       | 1                | 14%  | 0                   | 0%   |                                             |
| Left lower leg pain                            | 1                | 14%  | 0                   | 0%   |                                             |
| Malaise                                        | 1                | 14%  | 0                   | 0%   |                                             |
| Myalgia                                        | 2                | 29%  | 0                   | 0%   |                                             |
| Nausea-intermittent                            | 1                | 14%  | 0                   | 0%   |                                             |
| Sepsis/Bacteremia                              | 1                | 14%  | 1                   | 14%  | Probably associated with AML progression    |
| Sinus tachycardia-intermittent                 | 1                | 14%  | 0                   | 0%   |                                             |
| IFN-gamma + donor leukocyte infusion (Stage 2) |                  |      |                     |      |                                             |
| Adverse event term                             | Any grade<br>(n) | %    | Grade 3 or 4<br>(n) | %    | Comment                                     |
| Hematologic                                    |                  |      |                     |      |                                             |
| Anemia                                         | 5                | 83%  | 4                   | 67%  |                                             |
| Decreased ANC                                  | 5                | 83%  | 4                   | 67%  |                                             |
| Decreased ALC                                  | 3                | 50%  | 2                   | 33%  |                                             |
| Decreased platelets                            | 4                | 67%  | 4                   | 67%  |                                             |
| Decreased WBC                                  | 6                | 100% | 6                   | 100% |                                             |
| Non-hematologic                                |                  |      |                     |      |                                             |
| Abdominal pain                                 | 1                | 17%  | 0                   | 0%   | Most likely associated with AML progression |
| Acute kidney injury (nephrotic syndrome)       | 1                | 17%  | 1                   | 17%  |                                             |
| Adult respiratory distress syndrome            | 1                | 17%  | 1                   | 17%  | IPS, sensitive to steroid                   |
| Anorexia                                       | 1                | 17%  | 0                   | 0%   |                                             |
| Bacteremia                                     | 1                | 17%  | 0                   | 0%   |                                             |
| Blood bilirubin increased                      | 1                | 17%  | 1                   | 17%  |                                             |

|                                                |   |     |   |     |                                             |
|------------------------------------------------|---|-----|---|-----|---------------------------------------------|
| Chills                                         | 2 | 33% | 0 | 0%  |                                             |
| Confusion                                      | 2 | 33% | 0 | 0%  | ICANS, responsive to steroid                |
| CRS                                            | 1 | 17% | 0 | 0%  |                                             |
| Decreased Fibrinogen                           | 1 | 17% | 0 | 0%  |                                             |
| Diarrhea                                       | 3 | 50% | 1 | 17% |                                             |
| Dizziness                                      | 1 | 17% | 0 | 0%  |                                             |
| Dry skin                                       | 1 | 17% | 0 | 0%  |                                             |
| Dyspnea                                        | 1 | 17% | 0 | 0%  |                                             |
| Encephalopathy                                 | 1 | 17% | 0 | 0%  | ICANS, responsive to steroid                |
| Fatigue                                        | 2 | 33% | 0 | 0%  |                                             |
| Febrile neutropenia- SAE                       | 1 | 17% | 1 | 17% |                                             |
| Fever                                          | 3 | 50% | 0 | 0%  | Most likely associated with AML progression |
| Flu-like symptoms- SAE                         | 1 | 17% | 0 | 0%  |                                             |
| Gastrointestinal other: Jejunal ischemia       | 1 | 17% | 1 | 17% |                                             |
| General Disorders other: Night sweats          | 1 | 17% | 0 | 0%  |                                             |
| GI other: rectal bleed                         | 1 | 17% | 0 | 0%  |                                             |
| GVHD                                           | 4 | 67% | 0 | 0%  |                                             |
| Hypotension                                    | 2 | 33% | 0 | 0%  |                                             |
| Hypoxia                                        | 1 | 17% | 0 | 0%  |                                             |
| Increased Alk Phos                             | 2 | 33% | 0 | 0%  |                                             |
| Increased ALT                                  | 3 | 50% | 1 | 17% |                                             |
| Increased AST                                  | 3 | 50% | 1 | 17% |                                             |
| Increased Creatinine                           | 2 | 33% | 0 | 0%  |                                             |
| Increased GGT                                  | 1 | 17% | 1 | 17% |                                             |
| Increased INR                                  | 1 | 17% | 0 | 0%  |                                             |
| Insomnia- intermittent                         | 1 | 17% | 0 | 0%  |                                             |
| Lethargy                                       | 1 | 17% | 0 | 0%  |                                             |
| Myalgia                                        | 1 | 17% | 0 | 0%  |                                             |
| Nausea                                         | 4 | 67% | 0 | 0%  |                                             |
| Pruritis                                       | 3 | 50% | 0 | 0%  |                                             |
| Rash maculo-papular                            | 3 | 50% | 0 | 0%  |                                             |
| Respiratory other: Immune mediated lung injury | 1 | 17% | 0 | 0%  | IPS, sensitive to steroid                   |
| Shoulder pain                                  | 1 | 17% | 0 | 0%  |                                             |
| Vomiting                                       | 4 | 67% | 0 | 0%  |                                             |
| Weight loss                                    | 1 | 17% | 0 | 0%  |                                             |

**Supplemental Table 2. List of monoclonal antibodies**

| Specificity    | Fluorochrome         | mAb clone | ISOTYPE             | Vendor        | Catalog #  |
|----------------|----------------------|-----------|---------------------|---------------|------------|
| CCR7 (CD197)   | BV510                | G043H7    | Mouse IgG2a, kappa  | Biogend       | 3353232    |
| CD117          | PerCPCy5.5           | HLDA6     | Mouse IgG1, kappa   | Biogend       | 323416     |
| CD11b          | BV711                | ICRF44    | Mouse, IgG1, kappa  | Biogend       | 301344     |
| CD127          | BV711                | A019D5    | Mouse, IgG1, kappa  | Biogend       | 351327     |
| CD13           | APC                  | WM15      | Mouse IgG1, kappa   | Biogend       | 301706     |
| CD14           | BV785                | M5E2      | Mouse, IgG2a, kappa | Biogend       | 301839     |
| CD14           | PB                   | M5E2      | Mouse IgG2a, kappa  | Biogend       | 301828     |
| CD19           | PB                   | HIB19     | Mouse IgG1, kappa   | Biogend       | 302232     |
| CD19           | BV650                | HIB19     | Mouse IgG1, kappa   | Biogend       | 302238     |
| CD25           | Alexa Fluor 700      | M-A251    | Mouse, IgG1 kappa   | Biogend       | 356118     |
| CD274          | PECy7                | MIH1      | Mouse, IgG1, kappa  | BD Pharmigen  | 558017     |
| CD3            | APCCy7               | UCHT1     | Mouse IgG1, kappa   | Biogend       | 300426     |
| CD3            | PE/Dazzle 594        | UCHT1     | Mouse IgG1, kappa   | Biogend       | 300450     |
| CD33           | BUV395               | WM53      | Mouse IgG1, kappa   | BD Horizon    | 568374     |
| CD34           | PE                   | 581       | Mouse IgG1, kappa   | Biogend       | 343506     |
| CD38           | BUV737               | HB7       | Mouse, IgG1, kappa  | BD Horizon    | 612824     |
| CD4            | Alexa Fluor 700      | Sk3       | Mouse IgG1, kappa   | Biogend       | 344622     |
| CD4            | BUV395               | SK3       | Mouse, IgG1, kappa  | BD Horizon    | 563550     |
| CD45           | BV510                | HI30      | Mouse, IgG1, kappa  | Biogend       | 304036     |
| CD45           | BV785                | HI30      | Mouse, IgG1, kappa  | Biogend       | 304048     |
| CD45RA         | BV650                | HI100     | Mouse IgG2b, kappa  | Biogend       | 304136     |
| CD45RO         | PECy5                | UCHL1     | Mouse IgG2a, kappa  | Biogend       | 304208     |
| CD8            | BUV737               | SK1       | Mouse, IgG1, kappa  | BD Horizon    | 612754     |
| CD8            | PECy7                | SK1       | Mouse IgG1, kappa   | Biogend       | 344712     |
| FoxP3          | FITC                 | 234A/E7   | Mouse, IgG1, kappa  | eBioscience   | 11-4777-42 |
| Ki67           | PerCPCy5.5           | Ki67      | Mouse IgG1, kappa   | BioLegend     | 350520     |
| HLA-ABC        | Alexa Fluor 700      | W6/32     | Mouse IgG2a, kappa  | Biogend       | 311438     |
| HLA-DP         | BV650                | B7/21     | Mouse IgG1, kappa   | BD OptiBuild™ | 750871     |
| HLA-DR         | APC-Cy7              | L243      | Mouse IgG2a, kappa  | Biogend       | 307618     |
| HLA-DR         | FITC                 | L243      | Mouse IgG2a, kappa  | Biogend       | 307604     |
| ICAM-1         | PE/Dazzle 594        | HA58      | Mouse IgG1, kappa   | Biogend       | 353118     |
| NRP-1 (CD304)  | Alexa Fluor 647      | EPR3113   | Rabbit IgG          | Abcam         | ab198323   |
| NRP-1 (CD304)  | PE                   | 12C2      | Mouse IgG2a, kappa  | Biogend       | 354504     |
| PD1            | PE/Dazzle 594        | EH12.2H7  | Mouse IgG1, kappa   | Biogend       | 329940     |
| pSTAT1 (py701) | Alexa Fluor 488      | Clone 4a  | Mouse IgG2a         | BD Phosflow™  | 612596     |
| κ Isotype Ctrl | Alexa Fluor 700      |           | Mouse IgG2a         | Biogend       | 400248     |
| κ Isotype Ctrl | APC/Cyanine7         |           | Mouse IgG2a         | Biogend       | 400230     |
| κ Isotype Ctrl | Brilliant Violet 650 |           | Mouse IgG1          | Biogend       | 400163     |
| κ Isotype Ctrl | FITC                 |           | Mouse IgG1          | Biogend       | 400110     |
| κ Isotype Ctrl | PE/Dazzle 594        |           | Mouse IgG1,         | Biogend       | 400176     |
| κ Isotype Ctrl | APC                  |           | Mouse IgG2b,        | Biogend       | 400322     |

## **Supplemental Figure Legends**

**Supplemental Figure 1. Gating strategy for analyses of IFN- $\gamma$  effects.** Shown are representative data from the Patient 1 sample. (A) shows the upstream gating for subpopulations in panel (B).

**Supplemental Figure 2. Surface expression changes of potentially IFN- $\gamma$ -inducible surface proteins in different cell populations before and after in vivo IFN- $\gamma$ .** Gating was as in Supplemental Figure 2. Shown are pre- and post- IFN- $\gamma$  treatment expression of HLA-DR, HLA-ABC, HLA-DP, ICAM-1 and PD-L1 in cells with the following immunophenotypes: SSC<sup>low</sup>CD45<sup>dim</sup>CD34<sup>+</sup>, CD11b<sup>-</sup>CD13<sup>+</sup>, CD11b<sup>+</sup>CD13<sup>+</sup>, CD11b<sup>+</sup>CD13<sup>-</sup>, CD14<sup>+</sup>CD33<sup>+</sup>, and CD45<sup>bright</sup>.

**Supplemental Figure 3.** Representative flow cytometry plots of pSTAT1 in other lineage cells after in vitro culture with or without IFN- $\gamma$ .

**Supplemental Figure 4. Identification of malignant cells with scRNAseq analysis based on chromosome aberrations.** (A). Copy number variation confirms that the majority of HSCs and myeloid progenitors harbor der (1;7), add (10), del (20), known recurrent chromosomal abnormalities in Patient 1's case of MDS. (B) Copy number variation inferred by the scRNAseq confirms that the majority of HSCs and myeloid progenitors harbor a chromosome 7 deletion, a feature of AML in Patient 5. (C) Copy number variation inferred by scRNAseq confirms that the majority of HSCs and myeloid progenitors harbor abnormalities in chromosomes 3, 17, 18, 21, and 22, features of Patient 7's AML.



## Supplemental Data 2: Summary of ICANS cases

### Patient 3

A 64-year-old male with AML with complex cytogenetics and *TP53/IDH1* mutations received a matched unrelated donor (MUD) allogeneic stem cell transplantation (alloSCT) conditioned with fludarabine, busulfan, and ATG. He developed relapse with measurable residual disease (MRD) positivity as early as 33 days after transplantation. His disease was refractory to salvage therapies with decitabine/venetoclax and ivosidenib, evidenced by a bone marrow studies showing a hypocellular marrow with 29.5% myeloblasts with low donor chimerism: 25% in bone marrow; associated with 5% in CD33 cells, 6% in CD3 cells in peripheral blood. He was enrolled in this phase I clinical trial and started IFN- $\gamma$  on day 215 post-transplant and received DLI ( $10^7$  CD3+ cells/kg) on day +33 after IFN- $\gamma$ . His pre-DLI bone marrow showed 40.5% myeloblasts with slightly improved donor myeloid chimerism: 39% in bone marrow and 53% in 10% in blood CD33+ and CD3+ cells, respectively. On day +54, he developed biopsy-proven grade 2 skin acute GVHD. IFN- $\gamma$  was discontinued per the protocol. At the onset of GVHD, his peripheral blood chimerism showed further improvement with donor-derived hematopoiesis, including 98% in CD33 cells, 84% in CD3 cells, and 95% in whole blood, which was accompanied by neutrophil and platelet recovery. His skin GVHD rapidly resolved with systemic corticosteroids and low-dose tacrolimus with a trough goal of 5-10 ng/mL. After he completed a steroid taper, he was admitted for fever and multi-focal pneumonia on day +81. He was treated with broad-spectrum antimicrobials, including cefepime, isavuconazonium, and caspofungin, for a possible breakthrough fungal infection process while on outpatient voriconazole. On day +87, he developed altered mental status with decreased orientation, inability to follow commands or answer questions appropriately, and intermittent agitation; he did not have any change in level of alertness. Brain MRI did not show evidence of infarction, hemorrhage, or mass; there were, however, advanced chronic white matter microangiopathic changes. On day +88, he no

longer answered questions or responded to commands. Given concern for cefepime-induced neurotoxicity, he was switched to piperacillin-tazobactam, with no change in clinical status. EEG showed generalized periodic discharges with triphasic morphology and generalized delta/theta slowing concerning encephalopathy. He was started on levetiracetam due to an increased seizure risk. Cerebrospinal fluid showed normal cell count, with negative cytology and infectious studies. On day +89, he became somnolent and did not follow commands, answer questions, or attempt to communicate verbally or nonverbally. Simultaneously, he was noted to have transaminitis (peaked levels; ALT 105 IU/L, AST 178 IU/L, and normal bilirubin), rising eosinophilia with a peak absolute eosinophil count of  $1.0 \times 10^9/L$ , and erythematous skin lesions on his scalp, which biopsy showed vacuolar interface dermatitis consistent with GVHD. Due to concerns for recurrent grade 1 skin acute GVHD, he started receiving methylprednisolone 2mg/kg on day +89. Within 48 hours of systemic steroid initiation, his mental status significantly improved; he was alert, followed commands, and was able to answer simple questions verbally. Scalp erythema, transaminitis, and eosinophilia also rapidly resolved. Corticosteroids were tapered slowly, and his mental status returned to baseline. Given his dramatic clinical responsiveness to systemic steroids, we retrospectively annotated his encephalopathy as immune effector cell-associated neurotoxicity syndrome (ICANS), co-occurring with acute GVHD. Inflammation markers, such as CRP or ferritin, were not measured during the acute episodes.

Simultaneous with the onset of GVHD and ICANS, his cytopenias resolved, and a bone marrow examination on day +96 showed decreased myeloblasts to 12% blast by morphology with 100% donor chimerism and normal cytogenetics. A next-generation sequencing panel failed to reveal his previously detected TP53 and IDH1 mutations. A subsequent bone marrow on day +220 demonstrated a flow MRD negative CR with normal karyotype/FISH and 100% donor chimerism in bone marrow.

## Patient 6

A 73-year-old male with a history of coronary artery disease, atrial fibrillation, hypothyroidism, interstitial pulmonary fibrosis, and acute myeloid leukemia with complex karyotype including rearrangements of chromosome 3, del(5q), del(7q), trisomy 8 and the loss of 17p and *KRAS/NRAS* mutations received a MUD alloSCT with clofarabine, busulfan, and ATG conditioning. After successful engraftment, he developed progressive thrombocytopenia, and his bone marrow on post-transplant day +142 showed flow an abnormal myeloid population comprising 1.9% of cells. A FISH analysis revealed a del(5q) (23.7%) and loss of 17p (28%), and decreased donor bone marrow chimerism to 80%, all consistent with relapse. He was enrolled into the second cohort of this phase I trial with IFN- $\gamma$  begun on day 0 and a DLI at +7 day. On day +19, he developed a low-grade fever associated with an elevated CRP of 15.1 mg/dL and a ferritin of 5462 ng/mL. He was admitted to the hospital for an infectious disease workup. Blood cultures and respiratory virus tests were negative. A CT scan showed no definitive infection but showed progression of his known non-specific interstitial pneumonitis with fibrosis, manifested as reticular interstitial opacities. IFN- $\gamma$  was discontinued on day +23. Despite empiric antibiotics, his intermittent fever persisted. He subsequently developed a skin rash and transaminitis (peaked levels: ALT 169 IU/L, AST 109 IU/L, and a normal bilirubin). Given persistent fever with a progressively increased ferritin level (up to 10750 ng/mL), transaminitis, and new oxygen requirement, grade 2 cytokine releasing syndrome (CRS) was suspected, and he was begun on methylprednisolone 2mg/kg on day +28. While a skin biopsy showed no evidence of GVHD, a liver biopsy on day +28 showed minimal to mild portal and perivenular inflammation containing T lymphocytes associated with increased hepatocyte apoptosis and mild biliary epithelial cell senescence-related changes, favoring low-grade GVHD. Tacrolimus was added on day +32. Subsequently his transaminitis and hypoxia rapidly resolved

with reductions of CRP and ferritin levels. A bone marrow biopsy on day +34 showed a MRD-negative complete remission with 100% donor chimerism, normal FISH, and normal NGS.

Steroids were tapered to prednisone 40mg daily. On day +36, he developed encephalopathy consisting of lethargy and disorientation, with no focal neurological signs. A brain MRI showed a small acute right frontal lobe infarction and non-specific progression of patchy T2 flair periventricular hyperintensities. A CT angiogram of the head and neck angiogram showed mild chronic microvascular changes, no stenosis or occlusion, and patent carotid arteries. The echocardiogram did not show any evidence of an intra-cardiac thrombus. EEG showed rare generalized rhythmic delta and generalized theta activity with intermittent delta slowing, with no epileptiform abnormality, suggesting mild to moderate encephalopathy. The stroke team and neurology considered that the infarct size was too small to explain the clinical manifestation and concluded the MRI findings were likely incidental and not a cause of his encephalopathy.

Cerebrospinal fluid was negative for infectious disease, and cytology was negative for malignancy. Tacrolimus was discontinued for possible microangiopathic processes as a culprit for encephalopathy. Simultaneously, he suffered acute recurrent hypoxia and tachypnea requiring 2L/min of oxygen with a CT scan revealing ground glass opacities superimposed on the chronic interstitial disease. He was transferred to the ICU for close observation. Given the risk of complications, bronchoscopy was deferred, and the decision was made to start high dose pulsed methylprednisolone at 1gm/day for 3 days and etanercept twice weekly while covering a broad spectrum of microbes. After the pulsed methylprednisolone, his respiratory and mental status rapidly improved. He was transferred out of the ICU on day +41.

Given the rapid responsiveness to systemic immunosuppressants, we retrospectively annotated his respiratory complications as idiopathic pulmonary syndrome and encephalopathy as ICANS.

A

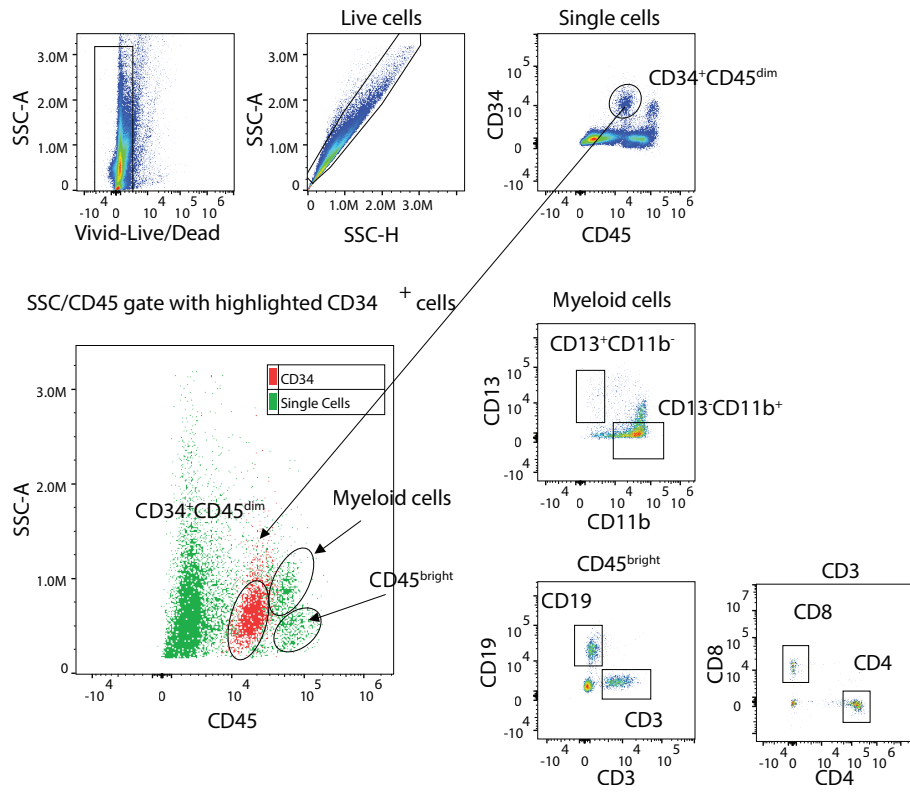

B

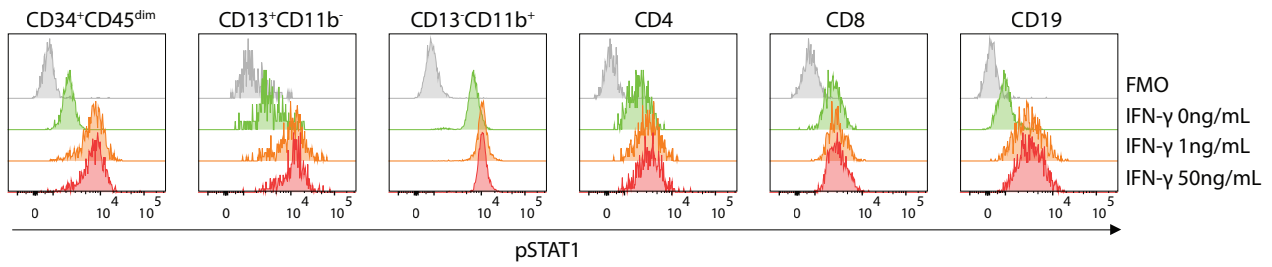

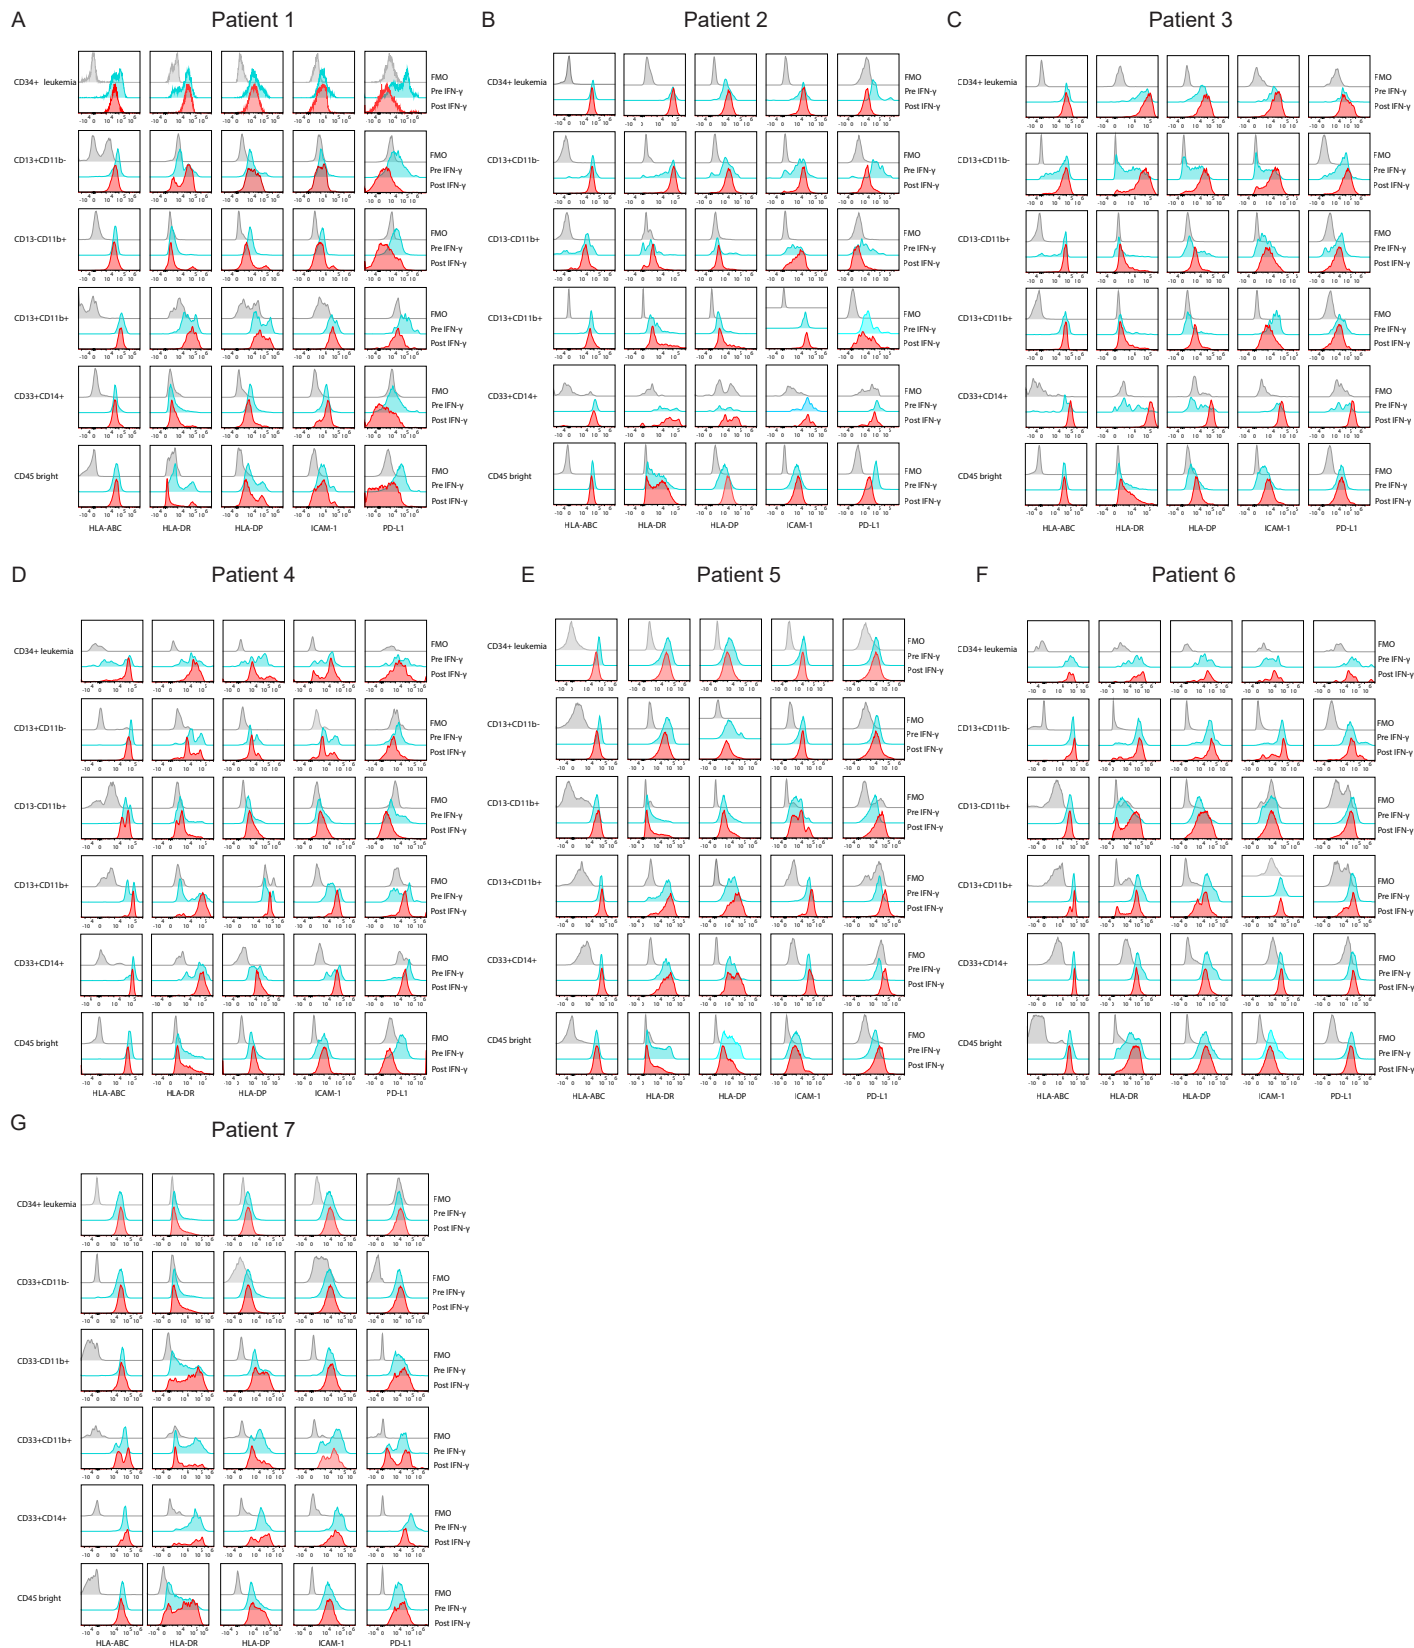

49 year old  
Female  
NPM1+  
FLT3-ITD+

IFN- $\gamma$  0ng/mL

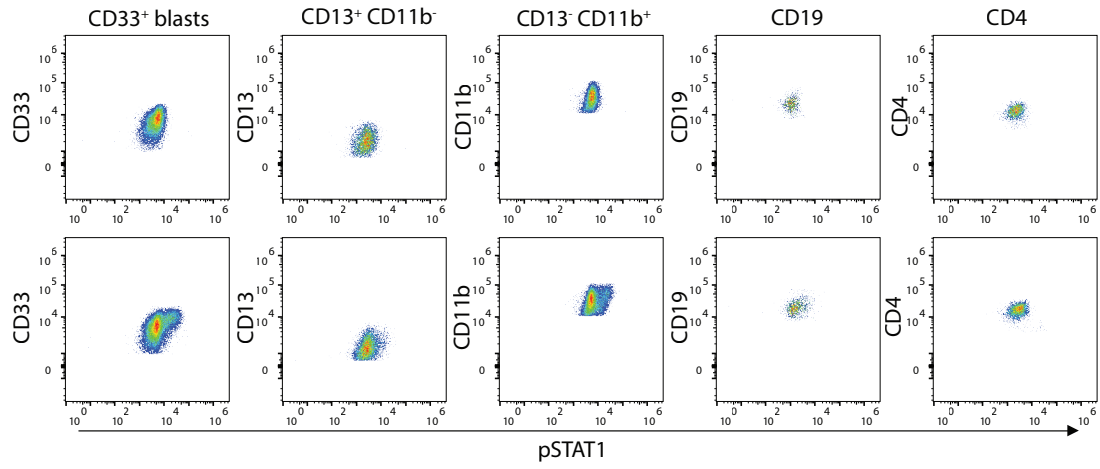

IFN- $\gamma$  50ng/mL

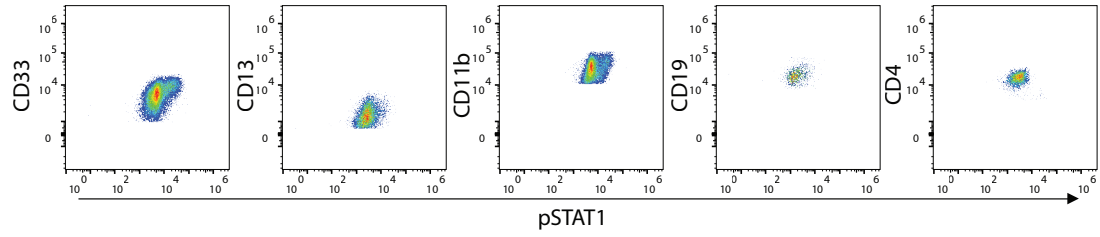

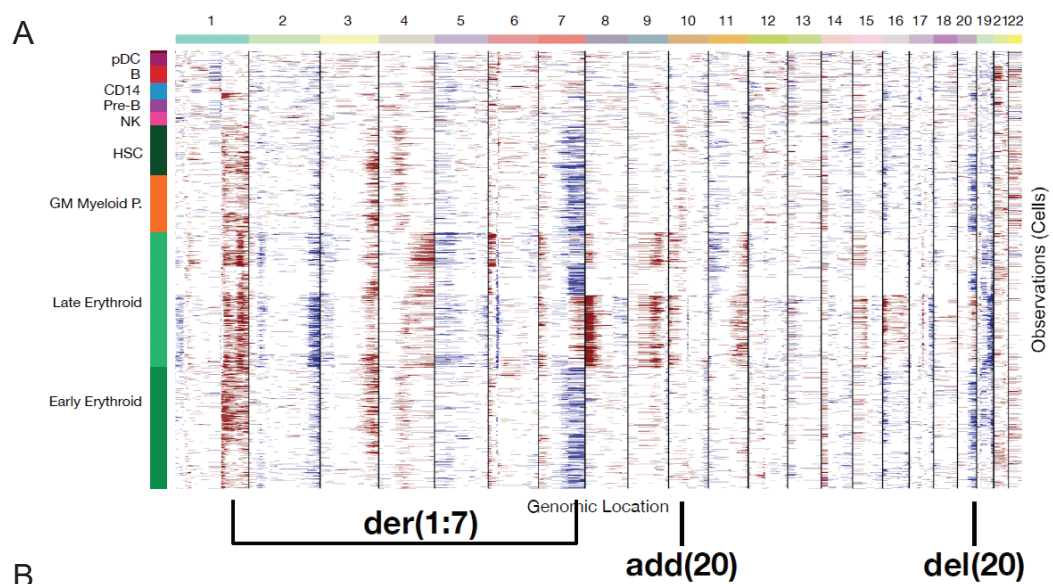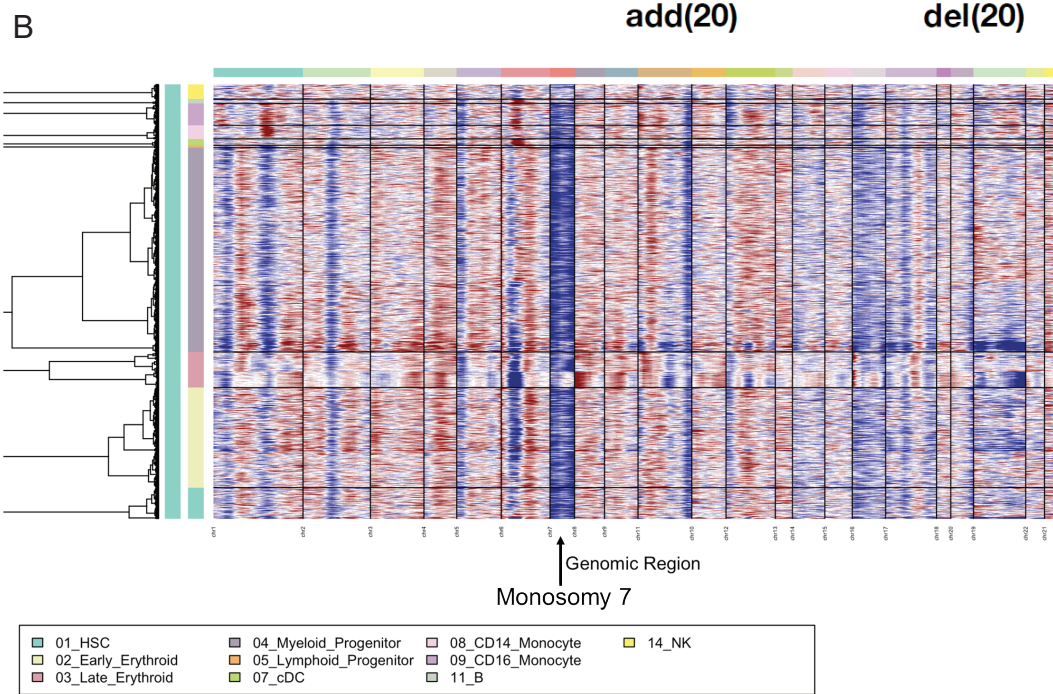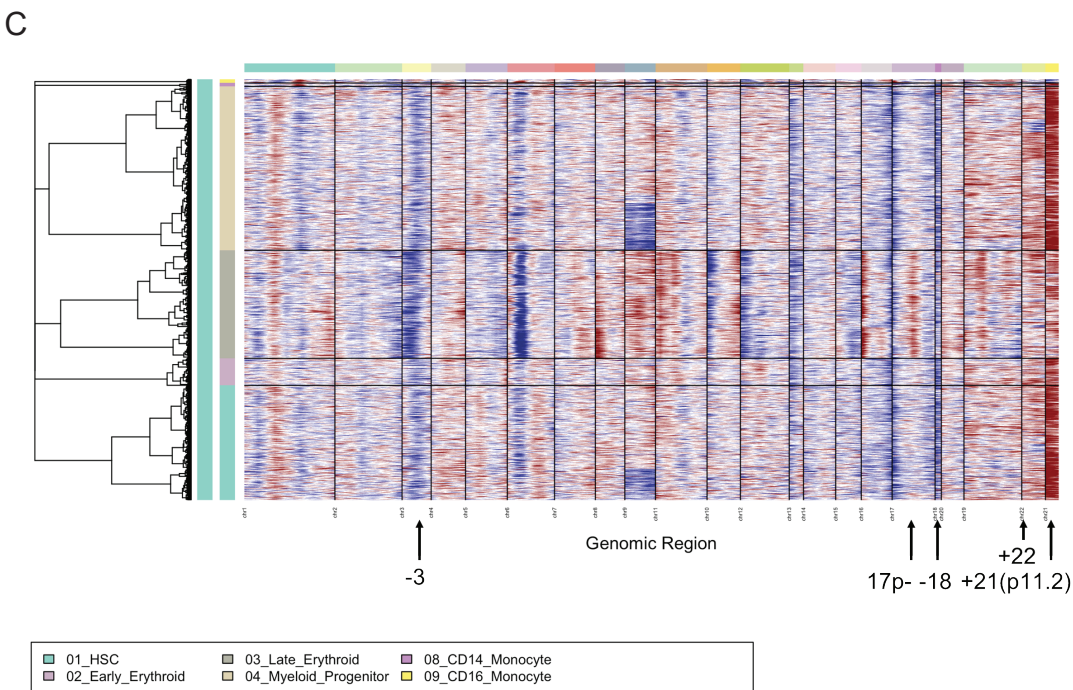

Supplement: sd1 [file 1]
